# Supplementary material for: Association of HLA-DRB1 genotype with younger age onset and elder age onset rheumatoid arthritis in Japanese populations
Source: PubMed Central journal article supplement — Medicine (Baltimore). 2019 Nov 27;98(48):e18218. doi: 10.1097/MD.0000000000018218 (PMC6890270; doi:10.1097/md.0000000000018218), 2019-11-27
Supplement: medi-98-e18218-s001.pdf [file medi-98-e18218-s001.pdf]

Supplementary Table S1. *HLA-DRB1* allele carrier frequency in the RA patients and the controls.

|                   | YORA<br>(n=89) |                        |                             |              | YORA vs. Control |                        |                             |               | MORA<br>(n=714) |                        |                             |              | MORA vs. Control |        |                      |               | EORA<br>(n=329) |              |                      |         | EORA vs. Control |              |                      |       | Control<br>(n=1026) |    |                      |       | YORA vs. EORA |    |                      |       | YORA vs. MORA |  |  |  | MORA vs. EORA |  |  |  |
|-------------------|----------------|------------------------|-----------------------------|--------------|------------------|------------------------|-----------------------------|---------------|-----------------|------------------------|-----------------------------|--------------|------------------|--------|----------------------|---------------|-----------------|--------------|----------------------|---------|------------------|--------------|----------------------|-------|---------------------|----|----------------------|-------|---------------|----|----------------------|-------|---------------|--|--|--|---------------|--|--|--|
|                   | <i>P</i>       | OR                     | <i>P<sub>c</sub></i>        | 95%CI        | <i>P</i>         | OR                     | <i>P<sub>c</sub></i>        | 95%CI         | <i>P</i>        | OR                     | <i>P<sub>c</sub></i>        | 95%CI        | <i>P</i>         | OR     | <i>P<sub>c</sub></i> | 95%CI         | <i>P</i>        | OR           | <i>P<sub>c</sub></i> | 95%CI   | <i>P</i>         | OR           | <i>P<sub>c</sub></i> | 95%CI | <i>P</i>            | OR | <i>P<sub>c</sub></i> | 95%CI | <i>P</i>      | OR | <i>P<sub>c</sub></i> | 95%CI |               |  |  |  |               |  |  |  |
| <i>DRB1*01:01</i> | 4 (4.5)        | 0.0676                 | 0.39 NS                     | (0.14-1.09)  | 102 (14.3)       | 0.0305                 | 1.39 0.9468                 | (1.04-1.85)   | 54 (16.4)       | 0.0085                 | 1.64 0.2458                 | (1.15-2.33)  | 110 (10.7)       | 0.0029 | 0.24 0.0669          | (0.08-0.68)   | 0.0074          | 0.28 0.2142  | (0.10-0.79)          | 0.4005  | 0.85 NS          | (0.59-1.22)  |                      |       |                     |    |                      |       |               |    |                      |       |               |  |  |  |               |  |  |  |
| <i>DRB1*03:01</i> | 1 (1.1)        | 0.2834                 | 3.88 NS                     | (0.40-37.65) | 1 (0.1)          | 0.6483                 | 0.48 NS                     | (0.05-4.61)   | 0 (0.0)         | 1.0000                 | 0.44 NS                     | (0.02-8.61)  | 3 (0.3)          | 0.2129 | 11.17 NS             | (0.45-276.56) | 0.2095          | 8.10 NS      | (0.50-130.69)        | 1.0000  | 1.39 NS          | (0.06-34.10) |                      |       |                     |    |                      |       |               |    |                      |       |               |  |  |  |               |  |  |  |
| <i>DRB1*04:01</i> | 7 (7.9)        | 0.0060                 | 3.90 0.1726                 | (1.62-9.39)  | 52 (7.3)         | 3.51X10 <sup>-7</sup>  | 3.58 1.09X10 <sup>-5</sup>  | (2.16-5.96)   | 21 (6.4)        | 0.0004                 | 3.11 0.0119                 | (1.69-5.73)  | 22 (2.1)         | 0.6339 | 1.25 NS              | (0.51-3.05)   | 0.8293          | 1.09 NS      | (0.48-2.47)          | 0.6955  | 1.15 NS          | (0.68-1.95)  |                      |       |                     |    |                      |       |               |    |                      |       |               |  |  |  |               |  |  |  |
| <i>DRB1*04:03</i> | 3 (3.4)        | 0.7916                 | 0.73 NS                     | (0.22-2.38)  | 13 (1.8)         | 0.0019                 | 0.39 0.0591                 | (0.21-0.72)   | 12 (3.6)        | 0.5371                 | 0.79 NS                     | (0.41-1.51)  | 47 (4.6)         | 1.0000 | 0.92 NS              | (0.25-3.34)   | 0.4071          | 1.88 NS      | (0.53-6.73)          | 0.0828  | 0.49 NS          | (0.22-1.09)  |                      |       |                     |    |                      |       |               |    |                      |       |               |  |  |  |               |  |  |  |
| <i>DRB1*04:04</i> | 0 (0.0)        | 1.0000                 | 1.27 NS                     | (0.07-23.77) | 4 (0.6)          | 0.7236                 | 1.44 NS                     | (0.36-5.77)   | 0 (0.0)         | 0.5777                 | 0.34 NS                     | (0.02-6.42)  | 4 (0.4)          | NA     | NA NA NA             | 1.0000        | 0.88 NS         | (0.05-16.52) | 0.3145               | 4.17 NS | (0.22-77.75)     |              |                      |       |                     |    |                      |       |               |    |                      |       |               |  |  |  |               |  |  |  |
| <i>DRB1*04:05</i> | 56 (62.9)      | 8.33X10 <sup>-14</sup> | 5.47 2.42X10 <sup>-12</sup> | (3.47-8.61)  | 364 (51.0)       | 1.02X10 <sup>-31</sup> | 3.35 3.15X10 <sup>-30</sup> | (2.73-4.12)   | 146 (44.4)      | 2.45X10 <sup>-12</sup> | 2.57 7.11X10 <sup>-11</sup> | (1.98-3.34)  | 243 (23.7)       | 0.0027 | 2.13 0.0615          | (1.31-3.44)   | 0.0423          | 1.63 NS      | (1.04-2.57)          | 0.0532  | 1.30 NS          | (1.00-1.69)  |                      |       |                     |    |                      |       |               |    |                      |       |               |  |  |  |               |  |  |  |
| <i>DRB1*04:06</i> | 8 (9.0)        | 0.5326                 | 1.23 NS                     | (0.58-2.65)  | 33 (4.6)         | 0.0204                 | 0.61 0.6337                 | (0.40-0.92)   | 9 (2.7)         | 0.0016                 | 0.35 0.0455                 | (0.17-0.71)  | 76 (7.4)         | 0.0141 | 3.51 0.3234          | (1.31-9.39)   | 0.1182          | 2.04 NS      | (0.91-4.56)          | 0.1764  | 1.72 NS          | (0.81-3.64)  |                      |       |                     |    |                      |       |               |    |                      |       |               |  |  |  |               |  |  |  |
| <i>DRB1*04:07</i> | 0 (0.0)        | 0.6243                 | 0.36 NS                     | (0.02-6.14)  | 3 (0.4)          | 0.0510                 | 0.28 NS                     | (0.08-0.99)   | 0 (0.0)         | 0.0290                 | 0.10 0.8420                 | (0.01-1.66)  | 15 (1.5)         | NA     | NA NA NA             | 1.0000        | 1.14 NS         | (0.06-22.17) | 0.5559               | 3.24 NS | (0.17-62.94)     |              |                      |       |                     |    |                      |       |               |    |                      |       |               |  |  |  |               |  |  |  |
| <i>DRB1*04:10</i> | 3 (3.4)        | 0.7546                 | 1.08 NS                     | (0.33-3.61)  | 34 (4.8)         | 0.0966                 | 1.55 NS                     | (0.95-2.54)   | 14 (4.3)        | 0.3807                 | 1.38 NS                     | (0.73-2.62)  | 32 (3.1)         | 1.0000 | 0.78 NS              | (0.22-2.79)   | 0.7887          | 0.70 NS      | (0.21-2.32)          | 0.8738  | 1.13 NS          | (0.60-2.13)  |                      |       |                     |    |                      |       |               |    |                      |       |               |  |  |  |               |  |  |  |
| <i>DRB1*07:01</i> | 0 (0.0)        | 1.0000                 | 0.60 NS                     | (0.03-10.37) | 4 (0.6)          | 0.5767                 | 0.64 NS                     | (0.20-2.08)   | 2 (0.6)         | 1.0000                 | 0.69 NS                     | (0.15-3.22)  | 9 (0.9)          | 1.0000 | 0.73 NS              | (0.03-15.38)  | 1.0000          | 0.88 NS      | (0.05-16.52)         | 1.0000  | 0.92 NS          | (0.17-5.05)  |                      |       |                     |    |                      |       |               |    |                      |       |               |  |  |  |               |  |  |  |
| <i>DRB1*08:02</i> | 4 (4.5)        | 0.5100                 | 0.62 NS                     | (0.22-1.75)  | 27 (3.8)         | 0.0043                 | 0.52 0.1343                 | (0.33-0.82)   | 10 (3.0)        | 0.0075                 | 0.42 0.2175                 | (0.21-0.81)  | 72 (7.0)         | 0.5088 | 1.50 NS              | (0.46-4.90)   | 0.7681          | 1.20 NS      | (0.41-3.50)          | 0.5947  | 1.25 NS          | (0.60-2.62)  |                      |       |                     |    |                      |       |               |    |                      |       |               |  |  |  |               |  |  |  |
| <i>DRB1*08:03</i> | 8 (9.0)        | 0.1563                 | 0.56 NS                     | (0.27-1.19)  | 66 (9.2)         | 0.0004                 | 0.58 0.0128                 | (0.43-0.79)   | 29 (8.8)        | 0.0040                 | 0.55 0.1150                 | (0.36-0.84)  | 153 (14.9)       | 1.0000 | 1.02 NS              | (0.45-2.32)   | 1.0000          | 0.97 NS      | (0.45-2.09)          | 0.9079  | 1.05 NS          | (0.67-1.67)  |                      |       |                     |    |                      |       |               |    |                      |       |               |  |  |  |               |  |  |  |
| <i>DRB1*08:09</i> | 0 (0.0)        | 1.0000                 | 2.29 NS                     | (0.11-48.06) | 0 (0.0)          | 0.5158                 | 0.29 NS                     | (0.01-5.98)   | 0 (0.0)         | 1.0000                 | 0.62 NS                     | (0.03-12.99) | 2 (0.2)          | NA     | NA NA NA             | 1.0000        | 2.66 NS         | (0.11-65.73) | 1.0000               | 1.39 NS | (0.06-34.10)     |              |                      |       |                     |    |                      |       |               |    |                      |       |               |  |  |  |               |  |  |  |
| <i>DRB1*08:23</i> | 0 (0.0)        | NA                     | NA NA                       | NA           | 1 (0.1)          | 0.4103                 | 4.32 NS                     | (0.18-106.11) | 0 (0.0)         | NA                     | NA NA                       | NA           | 0 (0.0)          | NA     | NA NA NA             | 1.0000        | 2.66 NS         | (0.11-65.73) | 1.0000               | 1.39 NS | (0.06-34.10)     |              |                      |       |                     |    |                      |       |               |    |                      |       |               |  |  |  |               |  |  |  |
| <i>DRB1*09:01</i> | 27 (30.3)      | 0.5376                 | 1.16 NS                     | (0.72-1.86)  | 188 (26.3)       | 0.6607                 | 0.95 NS                     | (0.77-1.18)   | 89 (27.1)       | 1.0000                 | 0.99 NS                     | (0.75-1.31)  | 280 (27.3)       | 0.5937 | 1.17 NS              | (0.70-1.96)   | 0.4466          | 1.22 NS      | (0.75-1.97)          | 0.8212  | 0.96 NS          | (0.72-1.29)  |                      |       |                     |    |                      |       |               |    |                      |       |               |  |  |  |               |  |  |  |
| <i>DRB1*10:01</i> | 1 (1.1)        | 0.3936                 | 2.32 NS                     | (0.27-20.08) | 14 (2.0)         | 0.0045                 | 4.08 0.1389                 | (1.46-11.39)  | 5 (1.5)         | 0.0693                 | 3.15 NS                     | (0.91-10.95) | 5 (0.5)          | 1.0000 | 0.74 NS              | (0.08-6.38)   | 1.0000          | 0.57 NS      | (0.07-4.37)          | 0.8044  | 1.30 NS          | (0.46-3.63)  |                      |       |                     |    |                      |       |               |    |                      |       |               |  |  |  |               |  |  |  |
| <i>DRB1*11:01</i> | 2 (2.2)        | 0.5717                 | 0.55 NS                     | (0.13-2.32)  | 23 (3.2)         | 0.4389                 | 0.80 NS                     | (0.48-1.34)   | 10 (3.0)        | 0.5074                 | 0.75 NS                     | (0.37-1.52)  | 41 (4.0)         | 1.0000 | 0.73 NS              | (0.16-3.41)   | 1.0000          | 0.69 NS      | (0.16-2.98)          | 1.0000  | 1.06 NS          | (0.50-2.26)  |                      |       |                     |    |                      |       |               |    |                      |       |               |  |  |  |               |  |  |  |
| <i>DRB1*12:01</i> | 9 (10.1)       | 0.3004                 | 1.43 NS                     | (0.69-2.95)  | 38 (5.3)         | 0.1134                 | 0.71 NS                     | (0.48-1.07)   | 24 (7.3)        | 1.0000                 | 1.00 NS                     | (0.62-1.61)  | 75 (7.3)         | 0.3793 | 1.43 NS              | (0.64-3.20)   | 0.0890          | 2.00 NS      | (0.93-4.29)          | 0.2082  | 0.71 NS          | (0.42-1.21)  |                      |       |                     |    |                      |       |               |    |                      |       |               |  |  |  |               |  |  |  |
| <i>DRB1*12:02</i> | 3 (3.4)        | 1.0000                 | 0.93 NS                     | (0.28-3.09)  | 21 (2.9)         | 0.4987                 | 0.81 NS                     | (0.47-1.40)   | 12 (3.6)        | 1.0000                 | 1.01 NS                     | (0.52-1.96)  | 37 (3.6)         | 1.0000 | 0.92 NS              | (0.25-3.34)   | 0.7419          | 1.15 NS      | (0.34-3.94)          | 0.5698  | 0.80 NS          | (0.39-1.65)  |                      |       |                     |    |                      |       |               |    |                      |       |               |  |  |  |               |  |  |  |
| <i>DRB1*13:01</i> | 0 (0.0)        | 1.0000                 | 0.67 NS                     | (0.04-11.69) | 2 (0.3)          | 0.2128                 | 0.36 NS                     | (0.08-1.69)   | 0 (0.0)         | 0.2108                 | 0.18 NS                     | (0.01-3.16)  | 8 (0.8)          | NA     | NA NA NA             | 1.0000        | 1.59 NS         | (0.08-33.43) | 1.0000               | 2.31 NS | (0.11-48.30)     |              |                      |       |                     |    |                      |       |               |    |                      |       |               |  |  |  |               |  |  |  |
| <i>DRB1*13:02</i> | 2 (2.2)        | 0.0001                 | 0.12 0.0036                 | (0.03-0.50)  | 56 (7.8)         | 4.83X10 <sup>-7</sup>  | 0.45 1.50X10 <sup>-5</sup>  | (0.33-0.62)   | 30 (9.1)        | 0.0020                 | 0.53 0.0575                 | (0.35-0.80)  | 163 (15.9)       | 0.0401 | 0.23 0.9212          | (0.05-0.98)   | 0.0519          | 0.27 NS      | (0.06-1.13)          | 0.4706  | 0.85 NS          | (0.53-1.35)  |                      |       |                     |    |                      |       |               |    |                      |       |               |  |  |  |               |  |  |  |
| <i>DRB1*14:02</i> | 0 (0.0)        | NA                     | NA NA                       | NA           | 2 (0.3)          | 0.1682                 | 7.20 NS                     | (0.35-150.28) | 0 (0.0)         | NA                     | NA NA                       | NA           | 0 (0.0)          | NA     | NA NA NA             | 1.0000        | 1.59 NS         | (0.08-33.43) | 1.0000               | 2.31 NS | (0.11-48.30)     |              |                      |       |                     |    |                      |       |               |    |                      |       |               |  |  |  |               |  |  |  |
| <i>DRB1*14:03</i> | 2 (2.2)        | 0.5752                 | 0.51 NS                     | (0.12-2.15)  | 14 (2.0)         | 0.0093                 | 0.45 0.2891                 | (0.24-0.82)   | 6 (1.8)         | 0.0428                 | 0.41 NS                     | (0.18-0.98)  | 44 (4.3)         | 0.6803 | 1.24 NS              | (0.25-6.24)   | 0.6948          | 1.15 NS      | (0.26-5.14)          | 1.0000  | 1.08 NS          | (0.41-2.83)  |                      |       |                     |    |                      |       |               |    |                      |       |               |  |  |  |               |  |  |  |
| <i>DRB1*14:04</i> | 0 (0.0)        | 1.0000                 | 1.27 NS                     | (0.07-23.77) | 0 (0.0)          | 0.1488                 | 0.16 NS                     | (0.01-2.96)   | 0 (0.0)         | 0.5777                 | 0.34 NS                     | (0.02-6.42)  | 4 (0.4)          | NA     | NA NA NA             | 1.0000        | 1.05 NS         | (0.31-3.56)  | 0.1638               | 0.61 NS | (0.32-1.16)      |              |                      |       |                     |    |                      |       |               |    |                      |       |               |  |  |  |               |  |  |  |
| <i>DRB1*14:05</i> | 0 (0.0)        | 0.0681                 | 0.14 NS                     | (0.01-2.23)  | 13 (1.8)         | 0.0152                 | 0.46 0.4726                 | (0.24-0.86)   | 10 (3.0)        | 0.6140                 | 0.77 NS                     | (0.38-1.56)  | 40 (3.9)         | 0.1287 | 0.17 NS              | (0.01-2.93)   | 0.3809          | 0.29 NS      | (0.02-4.93)          | 0.2561  | 0.59 NS          | (0.26-1.36)  |                      |       |                     |    |                      |       |               |    |                      |       |               |  |  |  |               |  |  |  |
| <i>DRB1*14:06</i> | 3 (3.4)        | 0.7369                 | 1.20 NS                     | (0.36-4.02)  | 23 (3.2)         | 0.6689                 | 1.14 NS                     | (0.66-1.99)   | 17 (5.2)        | 0.0530                 | 1.87 NS                     | (1.02-3.45)  | 29 (2.8)         | 0.5876 | 0.64 NS              | (0.18-2.24)   | 1.0000          | 1.05 NS      | (0.31-3.56)          | 0.7731  | 1.15 NS          | (0.64-2.05)  |                      |       |                     |    |                      |       |               |    |                      |       |               |  |  |  |               |  |  |  |
| <i>DRB1*14:07</i> | 0 (0.0)        | 1.0000                 | 2.29 NS                     | (0.11-48.06) | 1 (0.1)          | 1.0000                 | 0.72 NS                     | (0.06-7.93)   | 0 (0.0)         | 1.0000                 | 0.62 NS                     | (0.03-12.99) | 2 (0.2)          | NA     | NA NA NA             | 1.0000        | 2.66 NS         | (0.11-65.73) | 1.0000               | 1.39 NS | (0.06-34.10)     |              |                      |       |                     |    |                      |       |               |    |                      |       |               |  |  |  |               |  |  |  |
| <i>DRB1*14:54</i> | 2 (2.2)        | 0.2232                 | 0.38 NS                     | (0.09-1.60)  | 42 (5.9)         | 0.8350                 | 1.04 NS                     | (0.69-1.57)   | 17 (5.2)        | 0.8898                 | 0.91 NS                     | (0.52-1.58)  | 58 (5.7)         | 0.3884 | 0.42 NS              | (0.10-1.86)   | 0.2158          | 0.37 NS      | (0.09-1.55)          | 0.4712  | 0.85 NS          | (0.57-1.26)  |                      |       |                     |    |                      |       |               |    |                      |       |               |  |  |  |               |  |  |  |
| <i>DRB1*15:01</i> | 12 (13.5)      | 1.0000                 | 0.99 NS                     | (0.53-1.87)  | 81 (11.3)        | 0.1871                 | 0.82 NS                     | (0.61-1.09)   | 43 (13.1)       | 0.8532                 | 0.96 NS                     | (0.66-1.38)  | 139 (13.5)       | 1.0000 | 1.04 NS              | (0.52-2.06)   | 0.5972          | 1.22 NS      | (0.64-2.33)          | 0.4712  | 0.85 NS          | (0.57-1.26)  |                      |       |                     |    |                      |       |               |    |                      |       |               |  |  |  |               |  |  |  |
| <i>DRB1*15:02</i> | 13 (14.6)      | 0.1365                 | 0.61 NS                     | (0.33-1.12)  | 110 (15.4)       | 0.0008                 | 0.65 0.0255                 | (0.51-0.84)   | 55 (16.7)       | 0.5000                 | 0.72 NS                     | (0.52-0.99)  | 224 (21.8)       | 0.7467 | 0.85 NS              | (0.44-1.64)   | 1.0000          | 0.94 NS      | (0.50-1.75)          | 0.5851  | 0.91 NS          | (0.64-1.29)  |                      |       |                     |    |                      |       |               |    |                      |       |               |  |  |  |               |  |  |  |
| <i>DRB1*16:02</i> | 0 (0.0)        | 0.3891                 | 0.30 NS                     | (0.02-5.10)  | 9 (1.3)          | 0.4392                 | 0.71 NS                     | (0.32-1.60)   | 6 (1.8)         | 1.0000                 | 1.04 NS                     | (0.41-2.64)  | 18 (1.8)         | 0.3493 | 0.28 NS              | (0.02-4.98)   | 0.6081          | 0.41 NS      | (0.02-7.19)          | 0.5763  | 0.69 NS          | (0.24-1.95)  |                      |       |                     |    |                      |       |               |    |                      |       |               |  |  |  |               |  |  |  |
| <i>DRB1*04</i>    | 67 (75.3)      | 8.62X10 <sup>-11</sup> | 4.65                        | (2.83-7.65)  | 445 (62.3)       | 8.59X10 <sup>-21</sup> | 2.53                        | (2.08-3.07)   | 185 (56.2)      | 1.46X10 <sup>-7</sup>  | 1.96                        | (1.53-2.52)  | 406 (39.6)       | 0.0010 | 2.37                 | (1.40-4.02)   | 0.0190          | 1.84         | (1.11-3.05)          | 0.0660  | 1.29             | (0.99-1.68)  |                      |       |                     |    |                      |       |               |    |                      |       |               |  |  |  |               |  |  |  |
| <i>DRB1*12</i>    | 12 (13.5)      | 0.4807                 | 1.27                        | (0.67-2.41)  | 58 (8.1)         | 0.0590                 | 0.72                        | (0.52-1.01)   | 35 (10.6)       | 1.0000                 | 0.97                        | (0.65-1.45)  | 112 (10.9)       | 0.4520 | 1.31                 | (0.65-2.64)   | 0.1084          | 1.76         | (0.91-3.43)          | 0.1988  | 0.74             | (0.48-1.15)  |                      |       |                     |    |                      |       |               |    |                      |       |               |  |  |  |               |  |  |  |
| <i>DRB1*15</i>    | 25 (28.1)      | 0.3477                 | 0.77                        | (0.48-1.25)  | 189 (26.5)       | 0.0018                 | 0.71                        | (0.58-0.88)   | 96 (29.2)       | 0.1555                 | 0.82                        | (0.62-1.07)  | 344 (33.5)       | 0.8957 | 0.95                 | (0.56-1.59)   | 0.7993          | 1.09         | (0.66-1.77)          | 0.3702  | 0.87             | (0.65-1.17)  |                      |       |                     |    |                      |       |               |    |                      |       |               |  |  |  |               |  |  |  |
| SE                | 68 (76.4)      | 5.80X10 <sup>-11</sup> | 4.73                        | (2.85-7.84)  | 516 (72.3)       | 1.45X10 <sup>-39</sup> | 3.81                        | (3.10-4.68)   | 226 (68.7)      | 5.06X10 <sup>-19</sup> | 3.20                        | (2.46-4.17)  | 417 (40.6)       | 0.1909 | 1.48                 | (0.86-2.54)   | 0.4507          | 1.24         | (0.74-2.08)          | 0.2402  | 1.19             | (0.89-1.58)  |                      |       |                     |    |                      |       |               |    |                      |       |               |  |  |  |               |  |  |  |

Allele carrier frequencies are shown in parenthesis (%). Association was tested with the control by Fisher's exact test using 2X2 contingency tables. RA: rheumatoid arthritis, YORA: younger age onset RA, MORA: moderate age onset RA, EORA: elder age onset RA, OR: odds ratio, CI: confidence interval, NA not
