# Supplementary material for: Association of HLA-DRB1 genotype with younger age onset and elder age onset rheumatoid arthritis in Japanese populations
Source: PubMed Central journal article supplement — Medicine (Baltimore). 2019 Nov 27;98(48):e18218. doi: 10.1097/MD.0000000000018218 (PMC6890270; doi:10.1097/md.0000000000018218), 2019-11-27
Supplement: medi-98-e18218-s002.pdf [file medi-98-e18218-s002.pdf]

Supplementary Table S2. HLA-DRB1 genotype frequency in the RA patients and the controls.

|                       | YORA (n=89) |                        |                     | YORA vs. Control |                        |                     | MORA (n=714) |                        |                     | MORA vs. Control |        |                   | EORA (n=329) |                    |        | EORA vs. Control  |    |       | Control (n=1026) | YORA vs. EORA |    |       | YORA vs. MORA |    |       | MORA vs. EORA |    |       |
|-----------------------|-------------|------------------------|---------------------|------------------|------------------------|---------------------|--------------|------------------------|---------------------|------------------|--------|-------------------|--------------|--------------------|--------|-------------------|----|-------|------------------|---------------|----|-------|---------------|----|-------|---------------|----|-------|
|                       | P           | OR                     | 95%CI               | P                | OR                     | 95%CI               | P            | OR                     | 95%CI               | P                | OR     | 95%CI             | P            | OR                 | 95%CI  | P                 | OR | 95%CI |                  | P             | OR | 95%CI | P             | OR | 95%CI | P             | OR | 95%CI |
| DRB1*01:01/DRB1*04:05 | 0 (0.0)     | 0.6142                 | 0.45 (0.03-7.72)    | 22 (3.1)         | 0.0073                 | 2.69 (1.32-5.46)    | 12 (3.6)     | 0.0064                 | 3.20 (1.42-7.19)    | 12 (1.2)         | 0.0784 | 0.14 (0.01-2.42)  | 0.1585       | 0.17 (0.01-2.86)   | 0.7078 | 0.84 (0.41-1.72)  |    |       |                  |               |    |       |               |    |       |               |    |       |
| DRB1*04:01/DRB1*04:05 | 2 (2.2)     | 0.0179                 | 23.56 (2.12-262.47) | 17 (2.4)         | 2.63X10 <sup>-6</sup>  | 25.00 (3.32-188.29) | 6 (1.8)      | 0.0011                 | 19.04 (2.28-158.74) | 1 (0.1)          | 0.6803 | 1.24 (0.25-6.24)  | 1.0000       | 0.94 (0.21-4.15)   | 0.6559 | 1.31 (0.51-3.36)  |    |       |                  |               |    |       |               |    |       |               |    |       |
| DRB1*04:03/DRB1*04:05 | 1 (1.1)     | 0.5663                 | 1.28 (0.16-10.25)   | 7 (1.0)          | 0.8049                 | 1.12 (0.41-3.02)    | 1 (0.3)      | 0.4665                 | 0.34 (0.04-2.73)    | 9 (0.9)          | 0.3809 | 3.73 (0.23-60.19) | 1.0000       | 1.15 (0.14-9.44)   | 0.4472 | 3.25 (0.40-26.50) |    |       |                  |               |    |       |               |    |       |               |    |       |
| DRB1*04:05/DRB1*04:05 | 2 (2.2)     | 0.6815                 | 1.22 (0.28-5.32)    | 39 (5.5)         | 5.82X10 <sup>-5</sup>  | 3.06 (1.75-5.34)    | 16 (4.9)     | 0.0047                 | 2.71 (1.38-5.33)    | 19 (1.9)         | 0.3852 | 0.45 (0.10-1.99)  | 0.3034       | 0.40 (0.09-1.68)   | 0.7667 | 1.13 (0.62-2.05)  |    |       |                  |               |    |       |               |    |       |               |    |       |
| DRB1*04:05/DRB1*04:06 | 4 (4.5)     | 0.0155                 | 5.32 (1.60-17.63)   | 12 (1.7)         | 0.1793                 | 1.93 (0.81-4.61)    | 2 (0.6)      | 1.0000                 | 0.69 (0.15-3.22)    | 9 (0.9)          | 0.0204 | 7.69 (1.39-42.72) | 0.0906       | 2.75 (0.87-8.73)   | 0.2469 | 2.79 (0.62-12.56) |    |       |                  |               |    |       |               |    |       |               |    |       |
| DRB1*04:05/DRB1*04:10 | 1 (1.1)     | 0.3408                 | 2.90 (0.32-26.26)   | 14 (2.0)         | 0.0026                 | 5.11 (1.68-15.59)   | 4 (1.2)      | 0.1035                 | 3.14 (0.78-12.64)   | 4 (0.4)          | 1.0000 | 0.92 (0.10-8.37)  | 1.0000       | 0.57 (0.07-4.37)   | 0.4553 | 1.63 (0.53-4.98)  |    |       |                  |               |    |       |               |    |       |               |    |       |
| DRB1*04:05/DRB1*08:02 | 1 (1.1)     | 0.5283                 | 1.45 (0.18-11.69)   | 13 (1.8)         | 0.0719                 | 2.36 (0.97-5.72)    | 3 (0.9)      | 0.7340                 | 1.17 (0.31-4.44)    | 8 (0.8)          | 1.0000 | 1.23 (0.13-12.02) | 1.0000       | 0.61 (0.08-4.74)   | 0.4162 | 2.02 (0.57-7.12)  |    |       |                  |               |    |       |               |    |       |               |    |       |
| DRB1*04:05/DRB1*08:03 | 1 (1.1)     | 1.0000                 | 0.64 (0.08-4.82)    | 11 (1.5)         | 0.8498                 | 0.88 (0.41-1.87)    | 6 (1.8)      | 1.0000                 | 1.04 (0.41-2.64)    | 18 (1.8)         | 1.0000 | 0.61 (0.07-5.15)  | 1.0000       | 0.73 (0.09-5.69)   | 0.7938 | 0.84 (0.31-2.30)  |    |       |                  |               |    |       |               |    |       |               |    |       |
| DRB1*04:05/DRB1*09:01 | 10 (11.2)   | 0.0028                 | 3.38 (1.62-7.06)    | 57 (8.0)         | 9.14X10 <sup>-5</sup>  | 2.32 (1.52-3.55)    | 27 (8.2)     | 0.0014                 | 2.39 (1.43-3.99)    | 37 (3.6)         | 0.4004 | 1.42 (0.66-3.05)  | 0.3079       | 1.46 (0.72-2.97)   | 0.9029 | 0.97 (0.60-1.56)  |    |       |                  |               |    |       |               |    |       |               |    |       |
| DRB1*04:05/DRB1*10:01 | 1 (1.1)     | 0.2834                 | 3.88 (0.40-37.65)   | 4 (0.6)          | 0.0282                 | 13.00 (0.70-241.90) | 5 (1.5)      | 0.0238                 | 5.26 (1.25-22.14)   | 3 (0.3)          | 0.3809 | 3.73 (0.23-60.19) | 0.4451       | 2.02 (0.22-18.25)  | 1.0000 | 1.85 (0.21-16.60) |    |       |                  |               |    |       |               |    |       |               |    |       |
| DRB1*04:05/DRB1*12:01 | 7 (7.9)     | 0.0004                 | 7.21 (2.76-18.82)   | 12 (1.7)         | 0.4068                 | 1.44 (0.65-3.23)    | 5 (1.5)      | 0.5774                 | 1.30 (0.46-3.73)    | 12 (1.2)         | 0.0050 | 5.53 (1.71-17.88) | 0.0027       | 4.99 (1.91-13.04)  | 1.0000 | 1.11 (0.39-3.17)  |    |       |                  |               |    |       |               |    |       |               |    |       |
| DRB1*04:05/DRB1*12:02 | 2 (2.2)     | 0.0765                 | 5.87 (1.06-32.52)   | 12 (1.7)         | 0.0086                 | 4.37 (1.40-13.60)   | 3 (0.9)      | 0.3704                 | 2.35 (0.52-10.56)   | 4 (0.4)          | 0.2890 | 2.50 (0.41-15.19) | 0.6617       | 1.34 (0.30-6.11)   | 0.4127 | 1.86 (0.52-6.63)  |    |       |                  |               |    |       |               |    |       |               |    |       |
| DRB1*04:05/DRB1*13:02 | 2 (2.2)     | 1.0000                 | 0.92 (0.21-3.95)    | 27 (3.8)         | 0.1161                 | 1.57 (0.91-2.73)    | 7 (2.1)      | 0.8377                 | 0.87 (0.37-2.03)    | 25 (2.4)         | 1.0000 | 1.06 (0.22-5.18)  | 0.7614       | 0.58 (0.14-2.50)   | 0.1914 | 1.81 (0.78-4.20)  |    |       |                  |               |    |       |               |    |       |               |    |       |
| DRB1*04:05/DRB1*14:03 | 1 (1.1)     | 0.4423                 | 1.93 (0.23-16.23)   | 1 (0.1)          | 0.2512                 | 0.24 (0.03-1.98)    | 2 (0.6)      | 1.0000                 | 1.04 (0.21-5.18)    | 6 (0.6)          | 0.5134 | 1.86 (0.17-20.73) | 0.2095       | 8.10 (0.50-130.69) | 0.2355 | 0.23 (0.02-2.54)  |    |       |                  |               |    |       |               |    |       |               |    |       |
| DRB1*04:05/DRB1*14:05 | 0 (0.0)     | 1.0000                 | 0.54 (0.03-9.31)    | 5 (0.7)          | 0.6083                 | 0.72 (0.24-2.11)    | 3 (0.9)      | 1.0000                 | 0.93 (0.26-3.42)    | 10 (1.0)         | 1.0000 | 0.52 (0.03-10.18) | 1.0000       | 0.72 (0.04-13.14)  | 0.7125 | 0.77 (0.18-3.23)  |    |       |                  |               |    |       |               |    |       |               |    |       |
| DRB1*04:05/DRB1*14:06 | 2 (2.2)     | 0.0765                 | 5.87 (1.06-32.52)   | 6 (0.8)          | 0.3338                 | 2.17 (0.61-7.70)    | 5 (1.5)      | 0.0430                 | 3.94 (1.05-14.77)   | 4 (0.4)          | 0.6440 | 1.49 (0.28-7.81)  | 0.2192       | 2.71 (0.54-13.65)  | 0.3372 | 0.55 (0.17-1.81)  |    |       |                  |               |    |       |               |    |       |               |    |       |
| DRB1*04:05/DRB1*14:54 | 0 (0.0)     | 1.0000                 | 0.60 (0.03-10.37)   | 19 (2.7)         | 0.0057                 | 3.09 (1.39-6.87)    | 8 (2.4)      | 0.0418                 | 2.82 (1.08-7.36)    | 9 (0.9)          | 0.2116 | 0.21 (0.01-3.70)  | 0.2541       | 0.20 (0.01-3.33)   | 1.0000 | 1.10 (0.48-2.53)  |    |       |                  |               |    |       |               |    |       |               |    |       |
| DRB1*04:05/DRB1*15:01 | 10 (11.2)   | 1.09X10 <sup>-6</sup>  | 11.68 (4.81-28.34)  | 25 (3.5)         | 0.0009                 | 3.35 (1.64-6.85)    | 12 (3.6)     | 0.0049                 | 3.49 (1.53-7.99)    | 11 (1.1)         | 0.0124 | 3.34 (1.39-8.02)  | 0.0030       | 3.49 (1.62-7.53)   | 1.0000 | 0.96 (0.48-1.93)  |    |       |                  |               |    |       |               |    |       |               |    |       |
| DRB1*04:05/DRB1*15:02 | 8 (9.0)     | 0.0170                 | 2.80 (1.26-6.23)    | 42 (5.9)         | 0.0173                 | 1.77 (1.12-2.80)    | 16 (4.9)     | 0.2441                 | 1.45 (0.79-2.65)    | 35 (3.4)         | 0.1948 | 1.93 (0.80-4.67)  | 0.2458       | 1.58 (0.72-3.48)   | 0.5630 | 1.22 (0.68-2.21)  |    |       |                  |               |    |       |               |    |       |               |    |       |
| DRB1*01/DRB1*04       | 1 (1.1)     | 0.7147                 | 0.47 (0.06-3.55)    | 33 (4.6)         | 0.0094                 | 2.02 (1.19-3.45)    | 15 (4.6)     | 0.0555                 | 1.99 (1.03-3.85)    | 24 (2.3)         | 0.2114 | 0.24 (0.03-1.83)  | 0.1632       | 0.23 (0.03-1.74)   | 1.0000 | 1.01 (0.54-1.89)  |    |       |                  |               |    |       |               |    |       |               |    |       |
| DRB1*04/DRB1*04       | 12 (13.5)   | 0.0089                 | 2.65 (1.36-5.15)    | 99 (13.9)        | 3.97X10 <sup>-9</sup>  | 2.74 (1.95-3.85)    | 34 (10.3)    | 0.0050                 | 1.96 (1.26-3.06)    | 57 (5.6)         | 0.4447 | 1.35 (0.67-2.73)  | 1.0000       | 0.97 (0.51-1.84)   | 0.1337 | 1.40 (0.92-2.11)  |    |       |                  |               |    |       |               |    |       |               |    |       |
| DRB1*04/DRB1*12       | 9 (10.1)    | 0.0014                 | 4.16 (1.89-9.15)    | 28 (3.9)         | 0.1630                 | 1.51 (0.88-2.59)    | 12 (3.6)     | 0.3450                 | 1.40 (0.70-2.80)    | 27 (2.6)         | 0.0244 | 2.97 (1.21-7.30)  | 0.0151       | 2.76 (1.26-6.05)   | 1.0000 | 1.08 (0.54-2.15)  |    |       |                  |               |    |       |               |    |       |               |    |       |
| DRB1*04/DRB1*15       | 18 (20.2)   | 0.0002                 | 3.12 (1.77-5.51)    | 85 (11.9)        | 0.0025                 | 1.67 (1.20-2.30)    | 38 (11.6)    | 0.0301                 | 1.61 (1.07-2.43)    | 77 (7.5)         | 0.0520 | 1.94 (1.05-3.60)  | 0.0417       | 1.88 (1.07-3.30)   | 0.9180 | 1.03 (0.69-1.55)  |    |       |                  |               |    |       |               |    |       |               |    |       |
| SE/not SE             | 59 (66.3)   | 3.35X10 <sup>-10</sup> | 4.70 (2.81-7.86)    | 392 (54.9)       | 6.25X10 <sup>-29</sup> | 3.31 (2.67-4.11)    | 177 (53.8)   | 2.65X10 <sup>-14</sup> | 2.88 (2.18-3.79)    | 364 (35.5)       | 0.0845 | 1.63 (0.94-2.85)  | 0.2061       | 1.42 (0.84-2.40)   | 0.3606 | 1.15 (0.86-1.55)  |    |       |                  |               |    |       |               |    |       |               |    |       |
| SE/SE                 | 9 (10.1)    | 0.0007                 | 4.92 (2.15-11.29)   | 124 (17.4)       | 9.95X10 <sup>-30</sup> | 7.20 (5.02-10.31)   | 49 (14.9)    | 2.18X10 <sup>-13</sup> | 5.47 (3.52-8.50)    | 53 (5.2)         | 1.0000 | 0.90 (0.38-2.11)  | 0.4334       | 0.68 (0.30-1.54)   | 0.2199 | 1.32 (0.88-1.98)  |    |       |                  |               |    |       |               |    |       |               |    |       |

Genotype frequencies are shown in parenthesis (%). Association was tested with the control by Fisher's exact test using 2X2 contingency tables. RA: rheumatoid arthritis, YORA: younger age onset RA, MORA: moderate age onset RA, EORA: elder age onset RA, OR: odds ratio, CI: confidence interval.
