# Supplementary material for: Association of HLA-DRB1 genotype with younger age onset and elder age onset rheumatoid arthritis in Japanese populations
Source: PubMed Central journal article supplement — Medicine (Baltimore). 2019 Nov 27;98(48):e18218. doi: 10.1097/MD.0000000000018218 (PMC6890270; doi:10.1097/md.0000000000018218), 2019-11-27
Supplement: medi-98-e18218-s003.pdf [file medi-98-e18218-s003.pdf]

Supplementary Table S3. Linear regression analysis of *HLA* alleles for the age at onset of RA.

| <i>HLA</i> allele | PRC    | 95%CI          | <i>P</i> | <i>P<sub>c</sub></i> |
|-------------------|--------|----------------|----------|----------------------|
| <i>B*07:02</i>    | 0.95   | (-1.41~3.31)   | 0.4294   | NS                   |
| <i>B*08:01</i>    | -19.03 | (-46.72~8.66)  | 0.1777   | NS                   |
| <i>B*13:01</i>    | -1.80  | (-7.19~3.60)   | 0.5131   | NS                   |
| <i>B*13:02</i>    | 2.49   | (-11.38~16.37) | 0.7244   | NS                   |
| <i>B*15:01</i>    | 0.11   | (-2.16~2.38)   | 0.9234   | NS                   |
| <i>B*15:07</i>    | 11.41  | (2.16~20.65)   | 0.0156   | 0.5937               |
| <i>B*15:11</i>    | -1.89  | (-8.13~4.35)   | 0.5521   | NS                   |
| <i>B*15:18</i>    | -2.43  | (-5.81~0.96)   | 0.1601   | NS                   |
| <i>B*15:27</i>    | -8.03  | (-27.63~11.57) | 0.4216   | NS                   |
| <i>B*15:28</i>    | 7.99   | (-19.71~35.70) | 0.5715   | NS                   |
| <i>B*15:46</i>    | 3.99   | (-23.72~31.70) | 0.7777   | NS                   |
| <i>B*27:04</i>    | 17.52  | (-2.06~37.09)  | 0.0794   | NS                   |
| <i>B*27:05</i>    | 22.00  | (-5.68~49.68)  | 0.1191   | NS                   |
| <i>B*35:01</i>    | -1.79  | (-4.20~0.61)   | 0.1439   | NS                   |
| <i>B*37:01</i>    | 4.86   | (-1.38~11.09)  | 0.1266   | NS                   |
| <i>B*38:02</i>    | -6.16  | (-15.97~3.64)  | 0.2179   | NS                   |
| <i>B*39:01</i>    | -0.02  | (-3.13~3.10)   | 0.9923   | NS                   |
| <i>B*39:02</i>    | 3.96   | (-3.48~11.41)  | 0.2966   | NS                   |
| <i>B*39:04</i>    | 1.24   | (-12.63~15.11) | 0.8609   | NS                   |
| <i>B*39:23</i>    | -0.02  | (-27.72~27.69) | 0.9992   | NS                   |
| <i>B*40:01</i>    | 0.05   | (-2.52~2.62)   | 0.9676   | NS                   |
| <i>B*40:02</i>    | -1.88  | (-3.91~0.15)   | 0.0701   | NS                   |
| <i>B*40:03</i>    | 6.17   | (-4.33~16.66)  | 0.2493   | NS                   |
| <i>B*40:06</i>    | 1.59   | (-1.06~4.23)   | 0.2404   | NS                   |
| <i>B*44:02</i>    | -1.02  | (-17.03~14.99) | 0.9008   | NS                   |
| <i>B*44:03</i>    | 3.02   | (0.35~5.69)    | 0.0265   | NS                   |
| <i>B*46:01</i>    | -0.98  | (-4.09~2.12)   | 0.5345   | NS                   |
| <i>B*48:01</i>    | -1.52  | (-4.82~1.79)   | 0.3690   | NS                   |
| <i>B*51:01</i>    | 1.08   | (-1.07~3.23)   | 0.3237   | NS                   |
| <i>B*52:01</i>    | 0.47   | (-1.54~2.47)   | 0.6490   | NS                   |
| <i>B*54:01</i>    | -1.17  | (-3.13~0.78)   | 0.2376   | NS                   |
| <i>B*55:02</i>    | 2.21   | (-1.12~5.54)   | 0.1927   | NS                   |
| <i>B*55:04</i>    | -5.24  | (-17.65~7.17)  | 0.4078   | NS                   |
| <i>B*56:01</i>    | -4.33  | (-12.72~4.06)  | 0.3114   | NS                   |
| <i>B*56:03</i>    | -5.52  | (-25.12~14.07) | 0.5803   | NS                   |
| <i>B*58:01</i>    | 0.99   | (-8.84~10.82)  | 0.8430   | NS                   |
| <i>B*59:01</i>    | -2.54  | (-5.43~0.34)   | 0.0843   | NS                   |
| <i>B*67:01</i>    | 9.69   | (3.61~15.76)   | 0.0018   | 0.0683               |
| <i>DRB1*01:01</i> | 2.44   | (0.21~4.67)    | 0.0317   | 0.9205               |
| <i>DRB1*03:01</i> | -26.56 | (-46.10~-7.02) | 0.0078   | 0.2251               |
| <i>DRB1*04:01</i> | -0.56  | (-3.66~2.53)   | 0.7203   | NS                   |
| <i>DRB1*04:03</i> | 3.39   | (-1.64~8.42)   | 0.1865   | NS                   |
| <i>DRB1*04:04</i> | -7.54  | (-21.41~6.32)  | 0.2861   | NS                   |
| <i>DRB1*04:05</i> | -1.90  | (-3.29~-0.51)  | 0.0074   | 0.2151               |
| <i>DRB1*04:06</i> | -4.83  | (-8.82~-0.83)  | 0.0179   | 0.5202               |
| <i>DRB1*04:07</i> | -2.69  | (-18.70~13.32) | 0.7418   | NS                   |
| <i>DRB1*04:10</i> | 0.07   | (-3.90~4.04)   | 0.9738   | NS                   |
| <i>DRB1*07:01</i> | 1.49   | (-9.84~12.83)  | 0.7962   | NS                   |
| <i>DRB1*08:02</i> | -3.41  | (-7.81~0.99)   | 0.1292   | NS                   |
| <i>DRB1*08:03</i> | -0.09  | (-2.66~2.48)   | 0.9441   | NS                   |
| <i>DRB1*08:23</i> | 5.99   | (-21.72~33.70) | 0.6715   | NS                   |
| <i>DRB1*09:01</i> | -0.42  | (-1.99~1.15)   | 0.6006   | NS                   |
| <i>DRB1*10:01</i> | 3.70   | (-2.12~9.52)   | 0.2124   | NS                   |
| <i>DRB1*11:01</i> | 1.61   | (-3.15~6.36)   | 0.5076   | NS                   |
| <i>DRB1*12:01</i> | 0.52   | (-2.81~3.84)   | 0.7601   | NS                   |
| <i>DRB1*12:02</i> | -0.60  | (-5.10~3.91)   | 0.7950   | NS                   |
| <i>DRB1*13:01</i> | -4.02  | (-23.62~15.58) | 0.6873   | NS                   |
| <i>DRB1*13:02</i> | 3.59   | (0.62~6.55)    | 0.0177   | 0.5138               |
| <i>DRB1*14:02</i> | 1.99   | (-17.61~21.59) | 0.8423   | NS                   |
| <i>DRB1*14:03</i> | -1.17  | (-7.14~4.79)   | 0.6993   | NS                   |
| <i>DRB1*14:05</i> | 4.60   | (-1.23~10.43)  | 0.1218   | NS                   |
| <i>DRB1*14:06</i> | 1.92   | (-2.39~6.22)   | 0.3821   | NS                   |
| <i>DRB1*14:07</i> | -19.03 | (-46.72~8.66)  | 0.1777   | NS                   |
| <i>DRB1*14:54</i> | 0.04   | (-3.61~3.68)   | 0.9845   | NS                   |
| <i>DRB1*15:01</i> | 0.18   | (-2.15~2.50)   | 0.8825   | NS                   |
| <i>DRB1*15:02</i> | 1.01   | (-1.10~3.12)   | 0.3487   | NS                   |
| <i>DRB1*16:02</i> | 6.67   | (-0.52~13.86)  | 0.0688   | NS                   |
| <i>DQB1*02:01</i> | -5.55  | (-15.38~4.27)  | 0.2674   | NS                   |
| <i>DQB1*03:01</i> | 0.34   | (-1.48~2.16)   | 0.7128   | NS                   |
| <i>DQB1*03:02</i> | -0.86  | (-3.51~1.79)   | 0.5246   | NS                   |
| <i>DQB1*03:03</i> | -0.17  | (-1.72~1.38)   | 0.8304   | NS                   |
| <i>DQB1*03:06</i> | -14.39 | (-30.38~1.60)  | 0.0778   | NS                   |
| <i>DQB1*04:01</i> | -2.36  | (-3.70~-1.03)  | 0.0005   | 0.0079               |
| <i>DQB1*04:02</i> | -1.70  | (-5.18~1.79)   | 0.3397   | NS                   |
| <i>DQB1*05:01</i> | 2.48   | (0.45~4.50)    | 0.0168   | 0.2520               |
| <i>DQB1*05:02</i> | 0.28   | (-3.48~4.04)   | 0.8841   | NS                   |
| <i>DQB1*05:03</i> | 2.94   | (-1.22~7.10)   | 0.1652   | NS                   |
| <i>DQB1*06:01</i> | 1.11   | (-0.56~2.77)   | 0.1937   | NS                   |
| <i>DQB1*06:02</i> | 0.62   | (-1.71~2.96)   | 0.5997   | NS                   |
| <i>DQB1*06:03</i> | -4.02  | (-23.62~15.58) | 0.6873   | NS                   |
| <i>DQB1*06:04</i> | 3.16   | (0.12~6.19)    | 0.0416   | 0.6236               |
| <i>DQB1*06:09</i> | 4.81   | (-7.60~17.22)  | 0.4475   | NS                   |
| <i>DPB1*01:01</i> | -17.03 | (-44.72~10.66) | 0.2278   | NS                   |
| <i>DPB1*02:01</i> | -1.75  | (-3.05~-0.45)  | 0.0085   | 0.1357               |
| <i>DPB1*02:02</i> | 2.38   | (-0.59~5.36)   | 0.1167   | NS                   |
| <i>DPB1*03:01</i> | 2.63   | (-0.42~5.68)   | 0.0905   | NS                   |
| <i>DPB1*04:01</i> | 3.15   | (0.02~6.28)    | 0.0486   | 0.7781               |
| <i>DPB1*04:02</i> | -0.05  | (-1.87~1.78)   | 0.9588   | NS                   |
| <i>DPB1*05:01</i> | -0.34  | (-1.56~0.88)   | 0.5834   | NS                   |
| <i>DPB1*06:01</i> | -4.86  | (-13.65~3.94)  | 0.2786   | NS                   |
| <i>DPB1*09:01</i> | 1.43   | (-0.84~3.71)   | 0.2162   | NS                   |
| <i>DPB1*13:01</i> | 4.08   | (-1.41~9.57)   | 0.1452   | NS                   |
| <i>DPB1*14:01</i> | 0.73   | (-3.79~5.24)   | 0.7517   | NS                   |
| <i>DPB1*17:01</i> | 5.50   | (-8.37~19.37)  | 0.4363   | NS                   |
| <i>DPB1*19:01</i> | -4.25  | (-13.05~4.54)  | 0.3429   | NS                   |
| <i>DPB1*38:01</i> | -0.35  | (-11.69~10.99) | 0.9517   | NS                   |
| <i>DPB1*41:01</i> | 4.34   | (-6.99~15.68)  | 0.4525   | NS                   |
| <i>DPB1*47:01</i> | -1.02  | (-17.03~14.99) | 0.9008   | NS                   |

RA: rheumatoid arthritis, PRC: partial regression coefficient, CI: confidence interval. Association for age at onset of RA was tested by linear regression analysis.
