# Supplementary material for: Association of HLA-DRB1 genotype with younger age onset and elder age onset rheumatoid arthritis in Japanese populations
Source: PubMed Central journal article supplement — Medicine (Baltimore). 2019 Nov 27;98(48):e18218. doi: 10.1097/MD.0000000000018218 (PMC6890270; doi:10.1097/md.0000000000018218), 2019-11-27
Supplement: medi-98-e18218-s004.pdf [file medi-98-e18218-s004.pdf]

Supplementary Table S4. Multiple linear regression analysis between the *HLA* alleles for the age at onset of RA.

| <i>HLA</i> allele | Unconditioned |                  | Conditioned on <i>B*44:03</i> |                                 | Conditioned on <i>DRB1*13:02</i> |                                 | Conditioned on <i>DQB1*06:04</i> |                                 | Conditioned on <i>DPB1*04:01</i> |                                 |
|-------------------|---------------|------------------|-------------------------------|---------------------------------|----------------------------------|---------------------------------|----------------------------------|---------------------------------|----------------------------------|---------------------------------|
|                   | <i>P</i>      | PRC (95%CI)      | <i>P</i> <sub>adjusted</sub>  | PRC <sub>adjusted</sub> (95%CI) | <i>P</i> <sub>adjusted</sub>     | PRC <sub>adjusted</sub> (95%CI) | <i>P</i> <sub>adjusted</sub>     | PRC <sub>adjusted</sub> (95%CI) | <i>P</i> <sub>adjusted</sub>     | PRC <sub>adjusted</sub> (95%CI) |
| <i>B*44:03</i>    | 0.0265        | 3.02 (0.35~5.69) | NA                            | NA                              | 0.5286                           | 1.33 (-2.81~5.47)               | 0.3013                           | 2.16 (-1.94~6.26)               | 0.1538                           | 2.24 (-0.84~5.32)               |
| <i>DRB1*13:02</i> | 0.0177        | 3.59 (0.62~6.55) | 0.2954                        | 2.46 (-2.15~7.06)               | NA                               | NA                              | 0.2018                           | 5.05 (-2.71~12.80)              | 0.1273                           | 2.79 (-0.80~6.39)               |
| <i>DQB1*06:04</i> | 0.0416        | 3.16 (0.12~6.19) | 0.5863                        | 1.29 (-3.37~5.95)               | 0.6897                           | -1.61 (-9.55~6.32)              | NA                               | NA                              | 0.2747                           | 2.08 (-1.66~5.82)               |
| <i>DPB1*04:01</i> | 0.0486        | 3.15 (0.02~6.28) | 0.3179                        | 1.84 (-1.77~5.45)               | 0.4421                           | 1.48 (-2.30~5.27)               | 0.3352                           | 1.89 (-1.96~5.75)               | NA                               | NA                              |

  

| <i>HLA</i> allele | Unconditioned |                     | Conditioned on <i>DRB1*04:05</i> |                                 | Conditioned on <i>DQB1*04:01</i> |                                 | Conditioned on <i>DPB1*02:01</i> |                                 |
|-------------------|---------------|---------------------|----------------------------------|---------------------------------|----------------------------------|---------------------------------|----------------------------------|---------------------------------|
|                   | <i>P</i>      | PRC (95%CI)         | <i>P</i> <sub>adjusted</sub>     | PRC <sub>adjusted</sub> (95%CI) | <i>P</i> <sub>adjusted</sub>     | PRC <sub>adjusted</sub> (95%CI) | <i>P</i> <sub>adjusted</sub>     | PRC <sub>adjusted</sub> (95%CI) |
| <i>DRB1*04:05</i> | 0.0074        | -1.90 (-3.29~-0.51) | NA                               | NA                              | 0.1403                           | 2.83 (-0.93~6.60)               | 0.0044                           | -2.02 (-3.41~-0.63)             |
| <i>DQB1*04:01</i> | 0.0005        | -2.36 (-3.70~-1.03) | 0.0081                           | -4.89 (-8.52~-1.27)             | NA                               | NA                              | 0.0003                           | -2.44 (-3.77~-1.11)             |
| <i>DPB1*02:01</i> | 0.0085        | -1.75 (-3.05~-0.45) | 0.0051                           | -1.86 (-3.16~-0.56)             | 0.0052                           | -1.85 (-3.14~-0.55)             | NA                               | NA                              |

  

| <i>HLA</i> allele | Unconditioned |                  | Conditioned on <i>DRB1*01:01</i> |                                 | Conditioned on <i>DQB1*05:01</i> |                                 |
|-------------------|---------------|------------------|----------------------------------|---------------------------------|----------------------------------|---------------------------------|
|                   | <i>P</i>      | PRC (95%CI)      | <i>P</i> <sub>adjusted</sub>     | PRC <sub>adjusted</sub> (95%CI) | <i>P</i> <sub>adjusted</sub>     | PRC <sub>adjusted</sub> (95%CI) |
| <i>DRB1*01:01</i> | 0.0317        | 2.44 (0.21~4.67) | NA                               | NA                              | 0.8957                           | -0.38 (-6.07~5.31)              |
| <i>DQB1*05:01</i> | 0.0168        | 2.48 (0.45~4.50) | 0.2897                           | 2.79 (-2.38~7.97)               | NA                               | NA                              |

RA: rheumatoid arthritis, PRC: partial regression coefficient, CI: confidence interval. *P*, PRC, 95%CI, *P*<sub>adjusted</sub>, PRC<sub>adjusted</sub> were calculated by linear regression analysis under the additive model.
